1 Alternating selection for dispersal and multicellularity favors regulated life cycles

2  
3 Julien Barrere<sup>1</sup>, Piyush Nanda<sup>1</sup>, Andrew W. Murray<sup>1,2</sup>

4  
5  
6 Affiliations:

7  
8 <sup>1</sup> Department of Molecular and Cellular Biology, Harvard University, 52 Oxford Street,  
9 Cambridge, MA 02138, USA

10 <sup>2</sup> Lead Contact

11  
12 Correspondence: awm@mcb.harvard.edu (A.W.M.)

13  
14 Keywords: life cycle, evolution of multicellularity, *Saccharomyces cerevisiae* wild isolates,  
15 clustering, patchy resources, public goods.

16  
17 Summary:

18  
19 The evolution of complex multicellularity opened paths to increased morphological diversity and  
20 organizational novelty. This transition involved three processes: cells remained attached to one  
21 another to form groups, cells within these groups differentiated to perform different tasks, and the  
22 groups evolved new reproductive strategies<sup>1-5</sup>. Recent experiments identified selective pressures  
23 and mutations that can drive the emergence of simple multicellularity and cell differentiation<sup>6-11</sup>  
24 but the evolution of life cycles, in particular, how simple multicellular forms reproduce has been  
25 understudied. The selective pressure and mechanisms that produced a regular alternation  
26 between single cells and multicellular collectives are still unclear<sup>12</sup>. To probe the factors regulating  
27 simple multicellular life cycles, we examined a collection of wild isolates of the budding yeast, *S.*  
28 *cerevisiae*<sup>12</sup>. We found that all these strains can exist as multicellular clusters, a phenotype that  
29 is controlled by the mating type locus and strongly influenced by the nutritional environment.  
30 Inspired by this variation, we engineered inducible dispersal in a multicellular laboratory strain  
31 and demonstrated that a regulated life cycle has an advantage over constitutively single-celled or  
32 constitutively multicellular life cycles when the environment alternates between favoring  
33 intercellular cooperation (a low sucrose concentration) and dispersal (a patchy environment  
34 generated by emulsion). Our results suggest that simple multicellularity in wild isolates could be  
35 under selection and is regulated by their genetic composition and the environments they  
36 encounter and that alternating patterns of resource availability may have played a role in the  
37 evolution of life cycles.

38  
39  
40  
41  
42  
43  
44

## 45 **Results and Discussion:**

46

47 During the evolution of multicellularity, single cells start forming clusters of multiple cells. For this  
48 single cell to cluster transition to be complete, the group must reproduce. The simplest strategy  
49 is random breakage of the cluster into two or more smaller clusters, creating a minimal life cycle.  
50 While early life cycles might have been rudimentary, more complex life cycles have evolved  
51 resulting in a plethora of reproductive strategies with different group formation mechanisms, group  
52 features (size, shape, etc.), and propagation modes (propagule size and the signal, mechanism,  
53 and timing of offspring release)<sup>13</sup>. Here we explore life cycle variation within a species and the  
54 factors influencing these life cycles. We then ask which conditions could select for the evolution  
55 of regulated life cycles where multicellular growth is followed by a phase of dispersal into single  
56 cells.

57

58 The conditions that favor the evolution of multicellularity impose high costs on reproducing  
59 through single cells<sup>6,7,14,15</sup>, suggesting that additional selective pressures would be required to  
60 evolve regulated life cycles with single-celled intermediates. Patchily distributed resources have  
61 been proposed as a factor that could select for dispersal and thus favor the production of single-  
62 cell propagules<sup>16</sup>: at the same total number of cells, single cells can colonize more resource  
63 patches than multicellular clusters. Theoretical work<sup>17-21</sup> supports the idea that alternation  
64 between selection for multicellularity and selection for dispersal could result in the evolution of  
65 regulated multicellular life cycles but few experimental studies have tested these theoretical  
66 predictions<sup>22,23</sup> or examined factors influencing multicellularity within natural isolates of a single  
67 species.

68

69 Here, we characterized wild isolates of the budding yeast, *S. cerevisiae*, and showed that they  
70 form clonal multicellular clusters as part of their life cycles. These experiments also revealed that  
71 both the mating type locus and the identity of nutrients regulate the presence and size of  
72 multicellular clusters. Inspired by the environmental variation, we used a laboratory strain, W303,  
73 to engineer and compete three life cycles: constitutively single-celled, constitutively multicellular,  
74 and a regulated alternation between single cells and multicellular clusters. The single-celled life  
75 cycle was most fit in a patchy environment, the multicellular life cycle was fittest when the  
76 extracellular hydrolysis of sucrose selected for intercellular cooperation, and the regulated life  
77 cycles was fittest when conditions fluctuated between these two environments.

78

### 79 **The mating type locus regulates *S. cerevisiae*'s multicellularity**

80

81 Laboratory strains of *S. cerevisiae* were selected to be unicellular when they were domesticated,  
82 a feature that makes them useful for studying evolutionary forces that can select for the evolution  
83 of multicellularity<sup>6,7</sup>. We examined wild isolates to determine the effect of genetics and the  
84 environment on simple forms of multicellularity. Here we focus on clonal multicellularity (groups  
85 formed by persistence of the shared cell wall that links mother and the daughter cells). To  
86 characterize life cycles, we focused on 1) quantifying the size and size distribution of multicellular  
87 clusters, and 2) identifying factors that influence cluster size.

88

89 *S. cerevisiae* can grow as clonal, undifferentiated multicellular clusters<sup>7,24,25</sup>. This simple  
90 multicellular phenotype has been observed in engineered and laboratory evolved strains<sup>6,7,25</sup>.  
91 Clusters have also been described in the wild isolates RM11-a and YL1C<sup>26,27</sup>, prompting us to ask  
92 if this phenotype is also present in other *S. cerevisiae* isolates. We examined 22 phylogenetically  
93 diverse wild strains from the SGRP-2 collection, sampled from various environments (wine, sake,  
94 soil, baking, etc.)<sup>12,28</sup>. As a control, we included S288c, the unicellular lab strain whose sequence  
95 is the *S. cerevisiae* reference genome.

96  
97 We began by validating forward scatter, in flow cytometry, as a measure of cross sectional area  
98 and a tool to distinguish single cells from clusters. We verified that the forward scatter of  
99 polystyrene beads is linearly correlated with their measured cross sectional area (Figure S1A)  
100 and compared forward scatter measurements of single cells to strains known to form clusters.  
101 Cultures of these clustering strains are known to include clusters of different sizes as well single  
102 cells<sup>7</sup>. In addition, the area of a cluster is influenced both by the number and the size of cells it  
103 contains. To detect cluster formation, we use a “clustering score” that is the ratio of the mean  
104 forward scatter of the 10% largest objects in the population to the mean forward scatter of the  
105 10% smallest objects (Figure 1A). By focusing on the 10% largest objects, this score identifies if  
106 clusters are formed in a population. Dividing by the smallest 10% of the objects, which are almost  
107 all single cells, corrects for the differences in cell size between environments and strains. This  
108 clustering score is therefore a relative value to compare cluster formation in different conditions  
109 and genetic backgrounds. We validated this score using diploid and haploid single cells as well  
110 as haploid clusters: single cells of different sizes show similar clustering scores, while clusters  
111 have a higher value (Figure 1A). To ensure that we were only detecting clonal multicellularity, we  
112 prevented aggregative multicellularity (often referred to as flocculation) by using  
113 ethylenediaminetetraacetic acid (EDTA) to chelate divalent cations before measuring the  
114 clustering score<sup>29</sup>.

115  
116 We measured the clustering score of all 22 wild isolates and S288c both as diploids and haploids  
117 of both mating types ( $\mathbf{a}$  and  $\alpha$ ) in rich, glucose-containing medium (YPD). Our measurements  
118 showed that in their diploid state, the strains have low clustering scores, comparable to the values  
119 of S288c (Figure 1B). The haploids derived from wild isolates, however, showed a much greater  
120 clustering score, suggesting the presence of multicellular clusters (Figure 1B). Microscopy on a  
121 subset of these strains confirmed that they form multicellular clusters (Figure 1C) and reveal that  
122 natural isolates harbor a wide diversity of cluster morphology and size.

123  
124 The contrasting phenotypes of haploids and diploids suggested that the mating type locus, which  
125 is heterozygous in diploids ( $MAT\mathbf{a}/MAT\alpha$ ) and present in a single copy in haploids ( $MAT\mathbf{a}$  or  
126  $MAT\alpha$ ), plays a role in controlling multicellularity. We tested this hypothesis by randomly selecting  
127 5 diploid isolates and creating derivatives homozygous at the mating type locus ( $MAT\mathbf{a}/MAT\mathbf{a}$  or  
128  $MAT\alpha/MAT\alpha$  diploids). Figure 1D shows that becoming homozygous at the mating type greatly  
129 increased the size and frequency of clusters. Our results reveal that the formation of clonal  
130 multicellular clusters in wild isolates is controlled at least in part by the mating type locus.

131

132 **Environment modulates multicellular life cycle in *S. cerevisiae* wild isolates**

133

134 Environmental cues often drive transitions between different phases of life cycles<sup>30</sup>. Hence, we  
135 asked if the formation of clusters is influenced by the environment in which they grow.

136

137 We grew our strains in rich medium (YEP, yeast extract and peptone) containing five different  
138 carbon sources (glucose, sucrose, galactose, glycerol or ethanol). For each carbon source, we  
139 tested 2 different concentrations (0.2 and 2% (w/v)), and measured the clustering score in each  
140 of these environments.

141

142 Figure 2A and 2B show that the clustering score of some strains changes drastically between  
143 different environments. The effect of the carbon source was highest at a concentration of 2%  
144 (Figure 2C and Figure S2). The strongest effect was observed with the diploids in galactose: while  
145 diploids form single cells in glucose, many strains form clusters in galactose. Our results show  
146 that the multicellularity of *S. cerevisiae* is regulated by the environment, and suggest that the  
147 environment can act as a signal for switching between single-celled and multicellular stages of  
148 the yeast life cycle.

149

### 150 **Fluctuation between bulk sucrose and glucose emulsion selects for regulated life cycles**

151

152 Observing that the nutritional environment could influence the degree of multicellularity prompted  
153 us to ask if environmental oscillations could select for alternation between single-celled and  
154 multicellular phases of a life cycle. To address this question, we engineered the standard yeast  
155 laboratory strain, W303, previously used to study multicellularity<sup>7,25</sup>. We analyzed how the  
156 environment influenced competitions between strains with three reproductive modes: 1) a  
157 constitutively single-celled life cycle; 2) a constitutively multicellular life cycle and 3) a regulated  
158 life cycle able to switch between single cells and clusters (Figure 3A).

159

160 For the constitutively single-celled life cycle, we used a prototrophic, single-celled W303 strain.  
161 For constitutive multicellularity we deleted *ACE2*, which encodes a transcription factor that  
162 induces genes that separate daughter cells from their mothers, in the same background. Finally,  
163 to create a regulated life cycle, we placed *ACE2* under the control of a promoter that is activated  
164 by  $\beta$ -estradiol<sup>31</sup> allowing the strain to grow as clusters when uninduced and as single cells in the  
165 presence of  $\beta$ -estradiol. To confirm that we could control cluster size in the *ACE2*-inducible strain,  
166 we measured cluster size at increasing  $\beta$ -estradiol concentrations, and the number of generations  
167 needed for clusters to become single cells and vice versa. Figure 3C shows that increasing  $\beta$ -  
168 estradiol decreases cluster size and Figure 3D reveals that the switches between single cells and  
169 clusters happens in a few generations.

170

171 We used the three strains to ask how different environments would affect their fitness. It has been  
172 suggested that environmental cycles (tidal, seasonal, trophic, etc.) could have driven the evolution  
173 of regulated life cycles alternating between two phenotypes (i.e. single cell and cluster)<sup>32</sup>. Hence,  
174 we asked if an environment cycle that alternated between favoring single cells and favoring  
175 clusters would favor a regulated life cycle.

176

177 Because previous experiments<sup>7,25</sup> showed that yeast clusters grow better than single cells in low  
178 concentrations of sucrose, we used low sucrose as a selection for clusters. We tested the  
179 advantage of clusters by competing them against single cells in different concentration of sucrose.  
180 Because extracellular invertase hydrolyses sucrose to glucose and fructose, we used a mixture  
181 of glucose and fructose as a control, with both media having the same hexose monomer  
182 concentration (ranging from 10 to 40 mM). We also tested the effect of dilution at each transfer  
183 during the competition experiment (ranging from 100-fold to 10,000-fold). These experiments  
184 confirmed that clusters, grown on sucrose, have a fitness advantage over single cells and that  
185 this advantage is stronger as the sucrose concentration decreases (Figure S4A). We also  
186 confirmed that the dilution regime (strength of dilution between transfers of the competition  
187 experiment) greatly influences the fitness. Dilutions lower than 10,000-fold do not result in any  
188 fitness differences between single cells and clusters (Figure S4B).

189  
190 These and previous results<sup>7,25</sup> suggest that increased cluster size should correlate with an  
191 increased fitness on low sucrose concentrations. To directly test this hypothesis we measured  
192 the fitness of the inducibly multicellular strain expressing different levels of Ace2, allowing us to  
193 directly measure fitness as a function of size (Figure 4C). Figure 4A shows a positive relationship  
194 between size and fitness in low sucrose, confirming that size directly correlates with fitness  
195 advantage in low sucrose. In the control, where a mixture of glucose and fructose replaced  
196 sucrose, there was no difference in fitness as a function of size as the clusters are too small to  
197 limit the diffusion of nutrients to the center of the cluster<sup>33</sup>.

198  
199 To favor single cells, we created a patchy environment, in which resources were concentrated in  
200 small, separated patches by emulsifying glucose-containing medium in an inert oil. When  
201 populations are seeded in this environment, at a density of less than one cell per glucose-  
202 containing droplet, single cells should outcompete clusters thanks to their dispersal advantage: a  
203 cluster of 10 cells can only colonize 1 patch, while 10 individual cells can colonize 10 patches.  
204 Because the yield in a patch is set by the amount of the limiting resource in the patch, not the  
205 number of cells that invade it, more colonized patches result in a greater final population size.

206  
207 We used an emulsion, whose droplets contained glucose and fructose, as a patchy environment.  
208 The starting cell density was adjusted so that on average a droplet does not contain more than  
209 one cell, which means that clusters will seed a much smaller fraction of the patches than single  
210 cells. The cultures were grown to saturation for 48 h in emulsion before breaking the emulsion,  
211 diluting the culture and starting a new cycle of emulsion growth. We confirmed the stability of the  
212 emulsion by measuring the size of droplets just after emulsification and after 48h (Figure S4D).  
213 In addition, we confirmed that the emulsification protocol itself did not bias the frequency of single  
214 cells and clusters: we broke the emulsion immediately after its creation and measured the  
215 frequency of single cells and clusters (Figure S4C). Figure 4B shows that as the size of the  
216 clusters increases their fitness relative to single cells decreases. As a control, we performed the  
217 same experiments in a homogeneous and well-stirred environment and did not observe any  
218 fitness difference as a function of size.

219

220 With two environments, one favoring single cells and one favoring clusters, we could finally test  
221 whether fluctuation between them would favor regulated life cycles. We therefore competed our  
222 inducible strain against single cells or clusters in an alternating selection regime. Cells were grown  
223 for one cycle of growth in low sucrose followed by a cycle in the glucose emulsion before being  
224 transferred back in sucrose for the cycle to start again. To simulate a regulated life cycle, we  
225 induced our *ACE2* inducible strain to break the clusters into single cells before they entered the  
226 emulsion and allowed them to grow as clusters for the remainder of the competition experiment  
227 (Figure 4C). Figure 4D shows that this fluctuating environment caused regulated life cycles to  
228 outcompete both single-celled and multicellular life cycles, confirming our hypothesis. Directly  
229 competing the 3 life cycles together, also confirms that the regulated life cycle outcompetes the  
230 two other life cycles (S4E).

231  
232 Taken together, these fitness assays show that the outcome of competition between clusters and  
233 single cells is determined by the environment: in the homogenous, low sucrose environment,  
234 clusters are fitter, but in a patchy resource environment, it is single cells that are fitter. Most  
235 provocatively, our results suggest that alternating selection for dispersal and multicellularity favors  
236 regulated life cycles.

237  
238 Regulated, multicellular life cycles have evolved, independently, in many branches of the tree of  
239 life, including the fungi<sup>1,4,13</sup>. Many of these cycles pass through single-celled intermediates. We  
240 examined wild isolates of the budding yeast, *Saccharomyces cerevisiae*, and found that they form  
241 clonal multicellular clusters whose size is regulated by the mating type locus and their  
242 environment. These two forms of regulation suggested that some isolates of this species may use  
243 regulated multicellularity to increase their fitness in addition to the well characterized alternation  
244 between haploid and diploid states and the formation of spores to survive starvation and  
245 desiccation and promote dispersal. This hypothesis prompted us to ask if a regulated  
246 multicellularity confers an advantage over being constitutively single-celled or constitutively  
247 multicellular. We engineered a lab strain to exist in three states: constitutively single-celled,  
248 constitutively multicellular and capable of an environmentally regulated life cycle. Competing  
249 these strains with each other reveal that the single-celled life cycle is favored in a patchy resource  
250 environment, multicellular clusters are favored in an environment requiring metabolic cooperation,  
251 and that an alternation between these two environments favors a regulated life cycle.

252  
253 Clonal multicellularity in yeast is due to the failure to degrade the primary septum, the specialized  
254 portion of the cell wall that holds mother and daughter cells together after cytokinesis has  
255 separated their cytoplasm. The increased cluster size in haploids strains suggests that the  
256 expression of haploid specific genes may hinder the production of enzymes that degrade the  
257 primary septum. For example *Ste12*, a haploid specific transcription factor, is required for the  
258 expression of *AMN1*, a gene known to inhibit cell separation and the binding of the *Mata1/Mata2*  
259 heterodimer prevents *Ste12* from accessing the *AMN1* promoter in diploid cells<sup>27</sup>.

260  
261 Clonal multicellularity has an intrinsic advantage, resistance to cheating, over the agglomerative  
262 multicellularity exhibited by slime molds and some bacteria<sup>1,2</sup>. However, the group formation  
263 mechanisms constrain clonal multicellularity's ability to rapidly switch from single cell to

264 multicellularity. Under the fluctuating regime selection described here, we would predict that  
265 aggregative multicellularity carries an advantage as the switch from single cell to multicellularity  
266 can happen in less than a generation.

267  
268 Most natural isolates of *S. cerevisiae* are diploid and these diploids are primarily formed by mating  
269 between sister spores produced from the same meiosis. The budding pattern of haploid cells has  
270 been proposed to favor the mating that occurs when a germinated spore lacks an appropriate  
271 partner and uses mating type switching to produce descendants that have opposite mating  
272 types<sup>34,35</sup>. By forming multicellular clusters, these clonally related cells would still be able to mate,  
273 even in environments where fluid flow and other physical forces would otherwise separate the  
274 cells.

275  
276 In a single environment, the clonal clusters produced by experimental evolution or found in natural  
277 isolates usually break into smaller clusters rather than giving rise to populations of single cells.  
278 This mode of reproduction is favored in environments where metabolic cooperation or direct  
279 selection for cluster size gives clusters higher fitness than single cells. But if the environment  
280 alternates between favoring clusters and single cells, life cycles that regulate propagule size in  
281 response to the environmental fluctuation should be favored. We created this fluctuation by  
282 alternating between an environment that selected for metabolic cooperation and one that favored  
283 dispersal in a patchy environment. Our engineered strains add evidence that experimentally  
284 constructed, alternating environments can select for a regulated life cycle<sup>22,36</sup>. Outside the lab,  
285 natural oscillations, such as tidal, seasonal, or ecological fluctuations could have selected for the  
286 evolution of regulated life cycle. Examining wild isolates in their natural habitats and correlating  
287 their phenotype with fluctuations in their environments, over time and space, may reveal that *S.*  
288 *cerevisiae* is capable of more sophisticated and ecologically adaptive life cycles than have been  
289 discovered so far.

290

291

### 292 **Acknowledgements:**

293

294 The authors thank members of the Murray lab, especially Thomas LaBar and Tanush Jagdish for  
295 discussions, John Koschwanez for help with developing the project and Michael Desai, Michael  
296 Laub, Silvia De Monte, and William Ratcliff for their feedback on the manuscript. J.B, P.N and  
297 AWM are supported by the grant NIH/NIGMS R01 GM043987. A.W.M. is also supported by the  
298 NSF-Simons Center for the Mathematical and Statistical Analysis of Biology (NSF #1764269 ,  
299 Simons #594596).

300

### 301 **Author contributions:**

302

303 Conceptualization, J.B., and A.W.M.; Methodology, J.B., and A.W.M.; Investigation, J.B. and P.N.;  
304 Writing – Original Draft, J.B.; Writing – Review & Editing, J.B., P.N., and A.W.M.; Funding  
305 Acquisition, A.W.M; Supervision, A.W.M.

306

### 307 **Declaration of interests:**

308

309 The authors declare no competing interests.

310

311 **Main-text Figure Legends:**

312

313 See below figures.

314

315 **STAR Methods:**

316

317 **RESOURCE AVAILABILITY:**

318

319 Lead Contact:

320

321 Further information and requests for resources and reagents should be directed to and will be  
322 fulfilled by the Lead Contact, Andrew Murray ([awm@mcb.harvard.edu](mailto:awm@mcb.harvard.edu)).

323

324 Materials availability:

325

326 Yeast strains created in this study are available upon request from the Lead Contact.

327

328 Data and code availability:

329

330 All data and analysis codes in this study are available upon request from the Lead Contact.

331

332 **EXPERIMENTAL MODEL AND SUBJECT DETAILS:**

333

334 Yeast strains and media:

335

336 All experiments with the engineered strains were conducted in minimal (no amino acids or  
337 nucleotides) synthetic media made by combining refrigerated stocks of 10X Yeast Nitrogen Base  
338 (with ammonium sulfate) from BD Difco™ with the appropriate sugar (sucrose stocks were kept  
339 at -20°C). Once made, the minimal synthetic media was stored at 4°C and protected from light.  
340 β-estradiol stocks were made at a concentration of 10mM in ethanol and stored at -20°C. To  
341 obtain the final working concentration for the experiments, the β-estradiol stock was diluted in  
342 ultrapure water. Experiments involving the wild isolates experiments were performed in rich  
343 medium, YEP (1% Yeast-Extract, 2% Peptone) to which we added dextrose, sucrose, ethanol,  
344 galactose or glycerol at the appropriate concentration. YPD is YEP containing 2% w/v glucose.

345

346 Engineered strains: Engineered strains were constructed by first inserting the LexA-ER-AD  
347 system at the *HIS3* locus as described by Ottoz et al.<sup>31</sup>. We then replaced the *ACE2* promoter  
348 with an inducible promoter containing 1 LexA binding site to create the inducible strain. *ACE2* was  
349 deleted to create the positive control: the constitutively multicellular strain. Nothing was changed  
350 for the negative control: the constitutively single-celled strain. Each of these three strains were



351 marked with a different fluorescent protein, expressed from the *ACT1* promoter, to allow  
 352 competition essays.

353

354 Original wild isolates: The wild isolates used are from the SGRP-2 collection created by the Liti  
 355 lab<sup>12</sup>. Before performing the experiments, we confirmed the mating type of all the strains used  
 356 both by mating and by PCR<sup>37</sup>. Inconsistencies between reported and observed genotypes of the  
 357 haploids strains were corrected by combining mating type switching and sporulation. We created  
 358 a new set of diploids by mating the two heterothallic haploids, allowing us to have isogenic  
 359 haploids and diploids. We used all the strains from the collection that we could make available as  
 360 diploids, and both *MATa* and *MATα* haploids: 273614N, BC187, DBVPG1106, DBVPG1373,  
 361 DBVPG6044, 322134S, L\_1374, L\_1528, NCYC110, SK1, 378604,X UWOPS05-217.3, S288c,  
 362 UWOPS83-787.3, UWOPS87-2421, Y12, Y55, Yllc17\_E5, YJM975, YJM978, YJM981, YPS128,  
 363 and YPS606.

364

365 Homozygosing the MAT locus: to create diploids homozygous at the mating type locus, we  
 366 transformed diploids with a plasmid carrying the *HO* gene under an inducible promoter<sup>38</sup>. Colonies  
 367 were selected on uracil plates and allowed to lose the plasmid on YPD before being tested for  
 368 mating type both by mating and PCR using methods described here<sup>37</sup>.

369

370 Table S1 lists laboratory yeast strains used in this study:

371

372 All strains were derived from yJK089, a derivative of the W303 strain background

373

| Strain Name | Purpose                                          | Genotype                                                                                                                                                        |
|-------------|--------------------------------------------------|-----------------------------------------------------------------------------------------------------------------------------------------------------------------|
| yJB064      | Cluster forming strain                           | <i>can1-100 HIS3Δ::prACT1-yCerulean-tADH1-His3MX6 BUD4-S288C ACE2Δ::bleMX</i>                                                                                   |
| yJB077      | Reference strain for competition experiment      | <i>can1-100 HIS3Δ::prACT1-ymCherry-tADH1-His3MX6 BUD4-S288C</i>                                                                                                 |
| yJB128      | Single-celled strain with β-estradiol construct. | <i>can1-100 his3-11, 15::PACT1(-1-520)-LexA-ER-haB42-TCYC1 BUD4-S288C HOΔ::prACT1-yCerulean-ADH1tr-KanMX</i>                                                    |
| yJB130      | Inducible strain with β-estradiol construct.     | <i>can1-100 his3-11, 15::PACT1(-1-520)-LexA-ER-haB42-TCYC1 BUD4-S288C prACE2Δ::PTEF-HygMX-TTEF-insul-(lexA-box)1-PminCYC1 HOΔ::prACT1-ymCherry-ADH1tr-KanMX</i> |

|        |                                                           |                                                                                                                                                                                  |
|--------|-----------------------------------------------------------|----------------------------------------------------------------------------------------------------------------------------------------------------------------------------------|
| yJB136 | Single-celled strain with $\beta$ -estradiol construct.   | <i>can1-100 his3-11,15::PACT1(-1-520)-LexA-ER-haB42-TCYC1 BUD4-S288C</i><br><i>HO<math>\Delta</math>::prACT1-ymCitrine-ADH1tr-KanMX</i>                                          |
| yJB138 | Cluster forming strain with $\beta$ -estradiol construct. | <i>can1-100 his3-11,15::PACT1(-1-520)-LexA-ER-haB42-TCYC1 BUD4-S288C</i><br><i>HO<math>\Delta</math>::prACT1-ymCitrine-ADH1tr-KanMX</i><br><i>ACE2<math>\Delta</math>::HphMX</i> |

374  
375

## 376 **METHOD DETAILS**

377

### 378 Competition essays:

379

380 All competition experiments were performed in YNB complemented with the appropriate carbon  
381 source. Experiments were performed in plastic culture tubes. Fluorescently labeled strains were  
382 individually pre-grown overnight in media in which the competition experiment would be  
383 performed. Strains were then mixed in 1:1 ratios and diluted in PBS before being inoculated into  
384 the appropriate medium. Cultures were passaged for three cycles of growth and frequency of  
385 each strain was measured at each transfer with a flow cytometer (Fortessa, BD Bioscience,  
386 RRID:SCR\_013311, US). Because the distribution of number of cells per cluster was stable from  
387 one transfer from another we were able to estimate the relative fitness between single cells and  
388 clusters by extracting the ratio between fluorescent events (an event here can be a single cell, or  
389 a cluster of any size). The frequency of each strain was extracted with the CytoExploreR<sup>39</sup>  
390 package. To quantify the relative fitness we performed a linear regression between the number  
391 of generation elapsed between each transfer and the log of the ratio between the two genotypes.  
392 The relative fitness is the slope of the regressed line. Errors bars reflect the standard error of the  
393 mean from at least 3 independent replicates. Note that the reference strain varies for different  
394 experiments and is indicated for each plot.

395

### 396 Emulsions:

397

398 Emulsions were produced by mixing 150 ul of culture with 350 ul of FC-40 oil containing 2% (w/v)  
399 008-FluoroSurfactant (Ran Biotechnologies) in centrifuge tubes (VWR 76332-074). Note that  
400 emulsion stability is influenced by the type of centrifuge tube used. The tubes were then gently  
401 tapped before being vortexed at max speed for 30 sec. The tubes were allowed to rest before  
402 being opened and sealed with parafilm for the 48h incubation time. To break the emulsion, the  
403 tubes were first spun down with a counter top centrifuge, for 30 sec, the lower oil phase was  
404 removed before the addition of 100 ul of 1H,1H,2H,1H-Perfluoro-1-octanol (Sigma Aldrich) mixed  
405 by pipetting up and down and gently turning the tube. After 10 min of rest, tubes were spun down  
406 for 30 sec on a counter top centrifuge, the lower phase was removed before gently mixing the  
407 aqueous phase and recovering the cells by pipetting.

408

409 Cycling experiments:

410

411 For the cycling experiments (Figure 4C), the strains were first pre-grown overnight in YNB with  
412 100 mM glucose before being mixed in a 1:1 ratio and diluted 1:100 in YNB with 100 mM glucose  
413 to start the first step of the cycle. After 24h of incubation at 30°C on a roller drum, culture were  
414 diluted 1:10,000 in sucrose for the second step and incubated for 4 days. For the third step, the  
415 cells were diluted 1:100 in 100 mM glucose and  $\beta$ -estradiol was added for induction when needed.  
416 After 24h, the culture was diluted 1:10,000 and transferred into emulsion and allowed to grow to  
417 saturation before the emulsion was broken (as described above) and the diluted 1:100 in YNB  
418 with 100 mM glucose to restart the cycle. The frequency of each strain was measure at each  
419 transfer using flow cytometry.

420

421 Size measurements on wild isolates:

422

423 A colony of each wild isolates was inoculated in 300 ul of YPD in a 2 ml deep 96 well plate and  
424 allowed to grow overnight on a shaker at 1000 rpm. Cultures were then diluted 1:100 in the  
425 appropriate media and incubated for 48h before being transferred again 1:100 in the same media.  
426 Samples were measured in early stationary phase, after 24h or 48 depending on the media. To  
427 prevent flocculation, cultures were diluted in EDTA to a final concentration of 100 mM. Each of  
428 the 3 replicates of these measurement was perform as an independent batch.

429

430 Clustering Score:

431

432 To allow us to compare the wild isolates size measurements we developed a clustering score  
433 allowing us to quantify the clustering level of each strain and to compare between different strains  
434 and different environment (Figure 1A). Cultures of strains that form clusters are composed of  
435 clusters of different sizes but also of single cells. We therefore divide the forward scatter  
436 measurements by the mean of the 10% smallest forward scatter values of a population (usually  
437 mostly single cells), which corrects for differences in cell size between environments and strains.  
438 We then take the mean of the 10% largest corrected forward scatter values as the clustering  
439 score. This score is used as a relative value to compare the formation of clusters by different  
440 strains in different environments.

441

442 Microscopy:

443

444 All images of cells and clusters were taken in a 96-well glass-bottomed plate (Greiner bio-one,  
445 [www.gbo.com](http://www.gbo.com)) using a Nikon Ti inverted microscope ([www.nikoninstruments.com](http://www.nikoninstruments.com)) with  
446 MetaMorph software ([www.metamorph.com](http://www.metamorph.com)). Contrast of images was adjusted, and images were  
447 annotated with scale bars using the Fiji distribution of ImageJ<sup>40</sup>. Contrast was changed for visibility  
448 only and does not impact the results. Images of the emulsion for droplet size quantification were  
449 taken in a hemocytometer (Bulldog Bio).

450

451

452

453 **KEY RESOURCES TABLE**

454

| REAGENT or RESOURCE                           | SOURCE              | IDENTIFIER                                                                                            |
|-----------------------------------------------|---------------------|-------------------------------------------------------------------------------------------------------|
| Chemicals, peptides, and recombinant proteins |                     |                                                                                                       |
| $\beta$ -estradiol                            | SIGMA ALDRICH INC   | Cat#E8875                                                                                             |
| Tryptone to 2xYT Broth                        | Difco™              | Cat#90004-150                                                                                         |
| 1H,1H,2H,1H-Perfluoro-1-octanol               | SIGMA ALDRICH INC   | Cat#370533                                                                                            |
| Surfactant                                    | Ran Biotechnologies | Cat#008-FluoroSurfactant                                                                              |
| Fluorinert™ FC-40                             | SIGMA ALDRICH INC   | Cat#F9755                                                                                             |
| Experimental models: Organisms/strains        |                     |                                                                                                       |
| Laboratory Yeast strains                      | See Table S1        | N/A                                                                                                   |
| Wild isolates                                 | [13]                | SGRP-2                                                                                                |
| Recombinant DNA                               |                     |                                                                                                       |
| Plasmids                                      | [31]                | FRP1639 & FRP1642                                                                                     |
| Software and algorithms                       |                     |                                                                                                       |
| Fiji                                          | [40]                | <a href="https://imagej.net/software/fiji/">https://imagej.net/software/fiji/</a>                     |
| CytoExploreR                                  | [39]                | <a href="https://dillonhammi.github.io/CytoExploreR/">https://dillonhammi.github.io/CytoExploreR/</a> |

455

456 **Supplementary data legends:**

457

458 See bellow figures.

459

460 **References:**

461

462

463 1. Grosberg, R.K., and Strathmann, R.R. (2007). The Evolution of Multicellularity: A Minor Major  
464 Transition? *Annual Review of Ecology, Evolution, and Systematics* 38, 621–654.

465 10.1146/annurev.ecolsys.36.102403.114735.

466 2. Brunet, T., and King, N. (2017). The Origin of Animal Multicellularity and Cell Differentiation.  
467 *Developmental Cell* 43, 124–140. 10.1016/j.devcel.2017.09.016.

468 3. Knoll, A.H. (2011). The Multiple Origins of Complex Multicellularity. *Annual Review of Earth  
469 and Planetary Sciences* 39, 217–239. 10.1146/annurev.earth.031208.100209.

470 4. BONNER, J.T. (1993). *Life Cycles: Reflections of an Evolutionary Biologist* (Princeton  
471 University Press).

472 5. Kirk, D.L. (2005). A twelve-step program for evolving multicellularity and a division of labor.  
473 *Bioessays* 27, 299–310. 10.1002/bies.20197.

- 474 6. Ratcliff, W.C., Denison, R.F., Borrello, M., and Travisano, M. (2012). Experimental evolution  
475 of multicellularity. *PNAS* *109*, 1595–1600. 10.1073/pnas.1115323109.
- 476 7. Koschwanez, J.H., Foster, K.R., and Murray, A.W. (2013). Improved use of a public good  
477 selects for the evolution of undifferentiated multicellularity. *eLife* *2*, e00367.  
478 10.7554/eLife.00367.
- 479 8. Wahl, M.E., and Murray, A.W. (2016). Multicellularity makes somatic differentiation  
480 evolutionarily stable. *PNAS* *113*, 8362–8367. 10.1073/pnas.1608278113.
- 481 9. Kirk, M.M., Stark, K., Miller, S.M., Muller, W., Taillon, B.E., Gruber, H., Schmitt, R., and Kirk,  
482 D.L. (1999). *regA*, a *Volvox* gene that plays a central role in germ-soma differentiation,  
483 encodes a novel regulatory protein. *Development* *126*, 639–647. 10.1242/dev.126.4.639.
- 484 10. Dudin, O., Wielgoss, S., New, A.M., and Ruiz-Trillo, I. (2022). Regulation of sedimentation  
485 rate shapes the evolution of multicellularity in a close unicellular relative of animals. *PLoS*  
486 *biology* *20*, e3001551.
- 487 11. Oud, B., Guadalupe-Medina, V., Nijkamp, J.F., Ridder, D. de, Pronk, J.T., Maris, A.J.A. van,  
488 and Daran, J.-M. (2013). Genome duplication and mutations in *ACE2* cause multicellular,  
489 fast-sedimenting phenotypes in evolved *Saccharomyces cerevisiae*. *PNAS* *110*, E4223–  
490 E4231. 10.1073/pnas.1305949110.
- 491 12. Cubillos, F.A., Louis, E.J., and Liti, G. (2009). Generation of a large set of genetically  
492 tractable haploid and diploid *Saccharomyces* strains. *FEMS Yeast Res* *9*, 1217–1225.  
493 10.1111/j.1567-1364.2009.00583.x.
- 494 13. van Gestel, J., and Tarnita, C.E. (2017). On the origin of biological construction, with a focus  
495 on multicellularity. *PNAS* *114*, 11018–11026. 10.1073/pnas.1704631114.
- 496 14. Boraas, M.E., Seale, D.B., and Boxhorn, J.E. (1998). Phagotrophy by a flagellate selects for  
497 colonial prey: A possible origin of multicellularity. *Evolutionary Ecology* *12*, 153–164.  
498 10.1023/A:1006527528063.
- 499 15. Tong, K., Bozdog, G.O., and Ratcliff, W.C. (2022). Selective drivers of simple  
500 multicellularity. *Current Opinion in Microbiology* *67*, 102141. 10.1016/j.mib.2022.102141.
- 501 16. Black, A.J., Bourrat, P., and Rainey, P.B. (2020). Ecological scaffolding and the evolution of  
502 individuality. *Nat Ecol Evol*, 1–11. 10.1038/s41559-019-1086-9.
- 503 17. Pichugin, Y., Peña, J., Rainey, P.B., and Traulsen, A. (2017). Fragmentation modes and the  
504 evolution of life cycles. *PLOS Computational Biology* *13*, e1005860.  
505 10.1371/journal.pcbi.1005860.
- 506 18. Pichugin, Y., and Traulsen, A. (2020). Evolution of multicellular life cycles under costly  
507 fragmentation. *PLOS Computational Biology* *16*, e1008406. 10.1371/journal.pcbi.1008406.
- 508 19. Pichugin, Y., Park, H.J., and Traulsen, A. (2019). Evolution of simple multicellular life cycles  
509 in dynamic environments. *Journal of The Royal Society Interface* *16*, 20190054.  
510 10.1098/rsif.2019.0054.

- 511 20. Staps, M., van Gestel, J., and Tarnita, C.E. (2019). Emergence of diverse life cycles and life  
512 histories at the origin of multicellularity. *Nature Ecology & Evolution*, 1. 10.1038/s41559-  
513 019-0940-0.
- 514 21. Ispolatov, I., Ackermann, M., and Doebeli, M. (2012). Division of labour and the evolution of  
515 multicellularity. *Proceedings of the Royal Society B: Biological Sciences* 279, 1768–1776.  
516 10.1098/rspb.2011.1999.
- 517 22. Hammerschmidt, K., Rose, C.J., Kerr, B., and Rainey, P.B. (2014). Life cycles, fitness  
518 decoupling and the evolution of multicellularity. *Nature* 515, 75–79. 10.1038/nature13884.
- 519 23. Ratcliff, W.C., Herron, M.D., Howell, K., Pentz, J.T., Rosenzweig, F., and Travisano, M.  
520 (2013). Experimental evolution of an alternating uni- and multicellular life cycle in  
521 *Chlamydomonas reinhardtii*. *Nature Communications* 4, 2742. 10.1038/ncomms3742.
- 522 24. Ratcliff, W.C., Fankhauser, J.D., Rogers, D.W., Greig, D., and Travisano, M. (2015). Origins  
523 of multicellular evolvability in snowflake yeast. *Nature Communications* 6, 6102.  
524 10.1038/ncomms7102.
- 525 25. Koschwanez, J.H., Foster, K.R., and Murray, A.W. (2011). Sucrose Utilization in Budding  
526 Yeast as a Model for the Origin of Undifferentiated Multicellularity. *PLOS Biology* 9,  
527 e1001122. 10.1371/journal.pbio.1001122.
- 528 26. Yvert, G., Brem, R.B., Whittle, J., Akey, J.M., Foss, E., Smith, E.N., Mackelprang, R., and  
529 Kruglyak, L. (2003). Trans-acting regulatory variation in *Saccharomyces cerevisiae* and the  
530 role of transcription factors. *Nature Genetics* 35, 57–64. 10.1038/ng1222.
- 531 27. Fang, O., Hu, X., Wang, L., Jiang, N., Yang, J., Li, B., and Luo, Z. (2018). Amn1 governs  
532 post-mitotic cell separation in *Saccharomyces cerevisiae*. *PLoS Genet* 14, e1007691.  
533 10.1371/journal.pgen.1007691.
- 534 28. Liti, G., Carter, D.M., Moses, A.M., Warringer, J., Parts, L., James, S.A., Davey, R.P.,  
535 Roberts, I.N., Burt, A., Koufopanou, V., et al. (2009). Population genomics of domestic and  
536 wild yeasts. *Nature* 458, 337–341. 10.1038/nature07743.
- 537 29. Stratford, M. (1989). Yeast flocculation: Calcium specificity. *Yeast* 5, 487–496.  
538 10.1002/yea.320050608.
- 539 30. Coelho, S.M., Peters, A.F., Charrier, B., Roze, D., Destombe, C., Valero, M., and Cock, J.M.  
540 (2007). Complex life cycles of multicellular eukaryotes: New approaches based on the use  
541 of model organisms. *Gene* 406, 152–170. 10.1016/j.gene.2007.07.025.
- 542 31. Ottoz, D.S.M., Rudolf, F., and Stelling, J. (2014). Inducible, tightly regulated and growth  
543 condition-independent transcription factor in *Saccharomyces cerevisiae*. *Nucleic Acids Res*  
544 42, e130. 10.1093/nar/gku616.
- 545 32. De Monte, S., and Rainey, P.B. (2014). Nascent multicellular life and the emergence of  
546 individuality. *J Biosci* 39, 237–248. 10.1007/s12038-014-9420-5.
- 547 33. Lavrentovich, M.O., Koschwanez, J.H., and Nelson, D.R. (2013). Nutrient shielding in  
548 clusters of cells. *Phys. Rev. E* 87, 062703. 10.1103/PhysRevE.87.062703.

- 549 34. Wang, Y., Lo, W.-C., and Chou, C.-S. (2017). A modeling study of budding yeast colony  
550 formation and its relationship to budding pattern and aging. *PLOS Computational Biology*  
551 13, e1005843. [10.1371/journal.pcbi.1005843](https://doi.org/10.1371/journal.pcbi.1005843).
- 552 35. Nasmyth, K.A. (1982). Molecular genetics of yeast mating type. *Annu Rev Genet* 16, 439–  
553 500. [10.1146/annurev.ge.16.120182.002255](https://doi.org/10.1146/annurev.ge.16.120182.002255).
- 554 36. Beaumont, H.J.E., Gallie, J., Kost, C., Ferguson, G.C., and Rainey, P.B. (2009).  
555 Experimental evolution of bet hedging. *Nature* 462, 90–93. [10.1038/nature08504](https://doi.org/10.1038/nature08504).
- 556 37. Huxley, C., Green, E.D., and Dunham, I. (1990). Rapid assessment of *S. cerevisiae* mating  
557 type by PCR. *Trends Genet* 6, 236. [10.1016/0168-9525\(90\)90190-h](https://doi.org/10.1016/0168-9525(90)90190-h).
- 558 38. [8] Putting the HO gene to work: Practical uses for mating-type switching - ScienceDirect  
559 [https://www.sciencedirect-com.ezp-](https://www.sciencedirect-com.ezp-prod1.hul.harvard.edu/science/article/pii/S007668799194011Z?via%3DIhub)  
560 [prod1.hul.harvard.edu/science/article/pii/S007668799194011Z?via%3DIhub](https://www.sciencedirect-com.ezp-prod1.hul.harvard.edu/science/article/pii/S007668799194011Z?via%3DIhub).
- 561 39. Interactive Analysis of Cytometry Data <https://dillonhammill.github.io/CytoExploreR/>.
- 562 40. Schindelin, J., Arganda-Carreras, I., Frise, E., Kaynig, V., Longair, M., Pietzsch, T.,  
563 Preibisch, S., Rueden, C., Saalfeld, S., Schmid, B., et al. (2012). Fiji: an open-source  
564 platform for biological-image analysis. *Nat Methods* 9, 676–682. [10.1038/nmeth.2019](https://doi.org/10.1038/nmeth.2019).

565  
566  
567  
568  
569  
570  
571  
572  
573  
574  
575  
576  
577  
578  
579  
580  
581  
582  
583  
584  
585  
586  
587  
588  
589

590 **Graphical abstract:**

591

592 In progress

593

594 **Figures:**

595

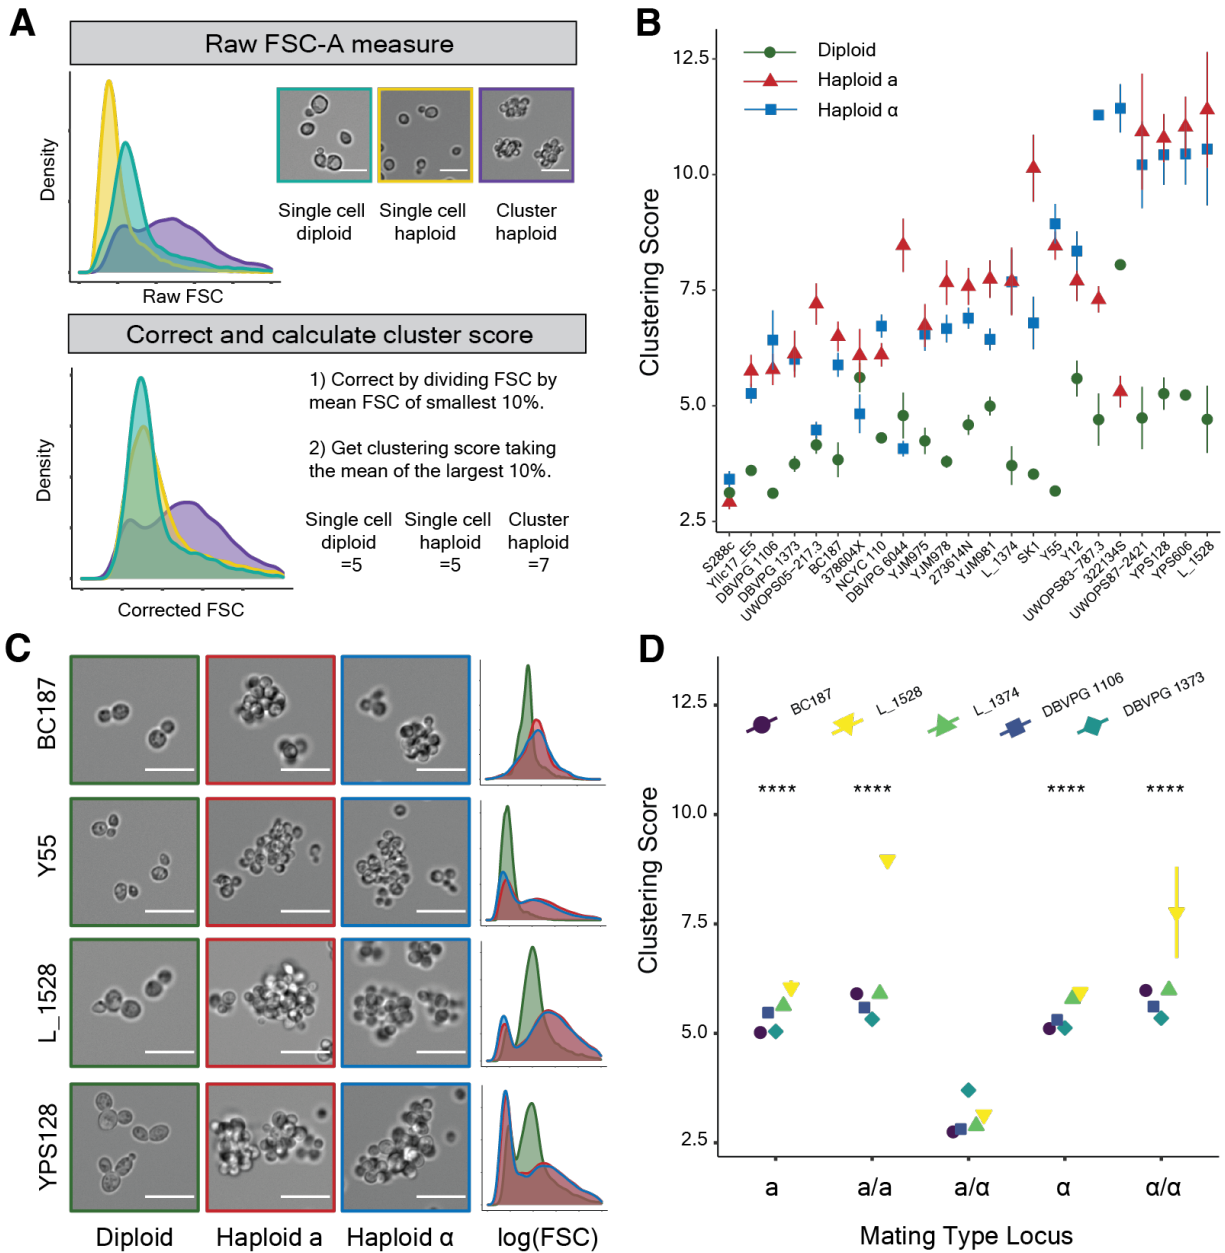

596

597

598 **Figure 1: Wild *S. cerevisiae* isolates grow as multicellular clusters in their haploid state.**

599 See also Figure S1.



600 A) Description of the clustering score. FSC stands for flow cytometry “Forward SCatter”. Scale  
601 bar represents 25  $\mu\text{m}$ . Data for the single-celled diploid and haploid are prototrophic W303 strains.  
602 The haploid cluster is the evolved cluster Evo2 from Koschwanez et al.

603 B) Clustering score measurements of the wild isolates grown in YPD. Haploids MATa and MAT $\alpha$   
604 are statistically different from the diploids ( $p$ -value <  $1\text{e-}13$ ), while haploids are not different from  
605 one another ( $p$ -value = 0.3) (Wilcoxon test). Error bars represent the standard error of the mean  
606 for 3 independent replicates.

607 C) Representative DIC (Differential Interference Contrast) images and forward scatter (FSC)  
608 distributions of a subset of the strains. Scale bar on the images represents 25  $\mu\text{m}$ .

609 D) Clustering score measurements for a subset of strains comparing haploid, diploids and diploids  
610 engineered to be homozygous at the mating type locus. Error bars represent the standard error  
611 of the mean for 3 independent replicates and  $p$ -values are the results of a Wilcoxon test: \*\*\*\*:  $p$  <  
612  $1\text{e-}4$  for comparisons against the a/ $\alpha$  diploid.

613

614

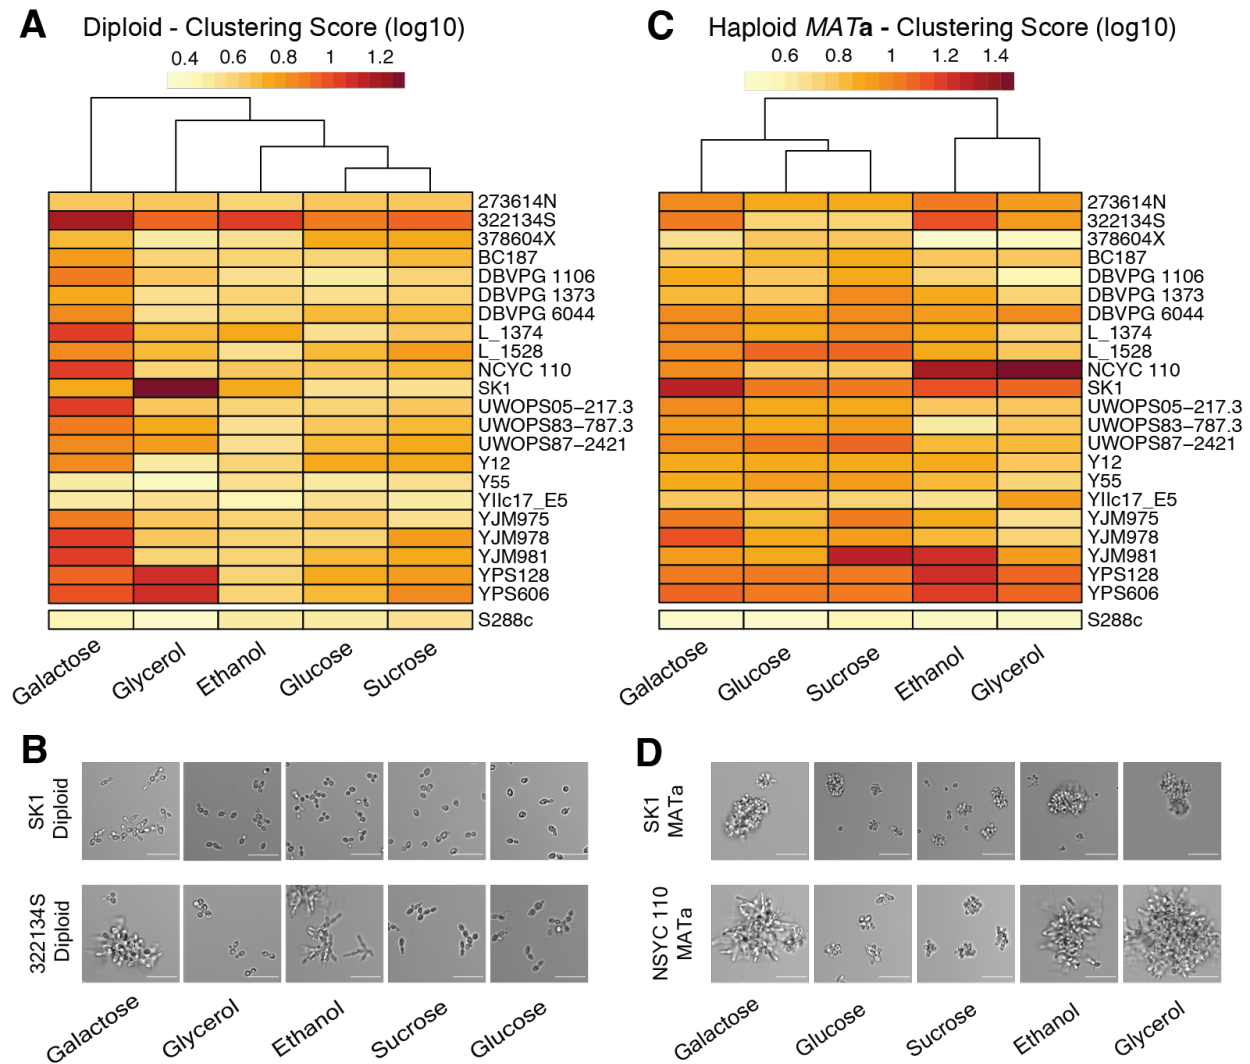

615

616 **Figure 2: Environment modulates multicellularity in wild *S. cerevisiae* isolates:**

617 See also Figure S2.

618 A) Clustering score for diploid isolates. Environments are hierarchically grouped by clustering  
619 score similarity. Strains were grown in yeast extract and peptone (YEP) complemented with 5  
620 different carbon source (concentration of 2% (w/v)).

621 B) Representative DIC images of selected diploid strains. Scale bar represents 50  $\mu$ m

622 C) Same as A but for *MATa* strains. See Figure S2 for *MATa* heatmap.

623 D) Same as B but for *MATa* strains

624

625

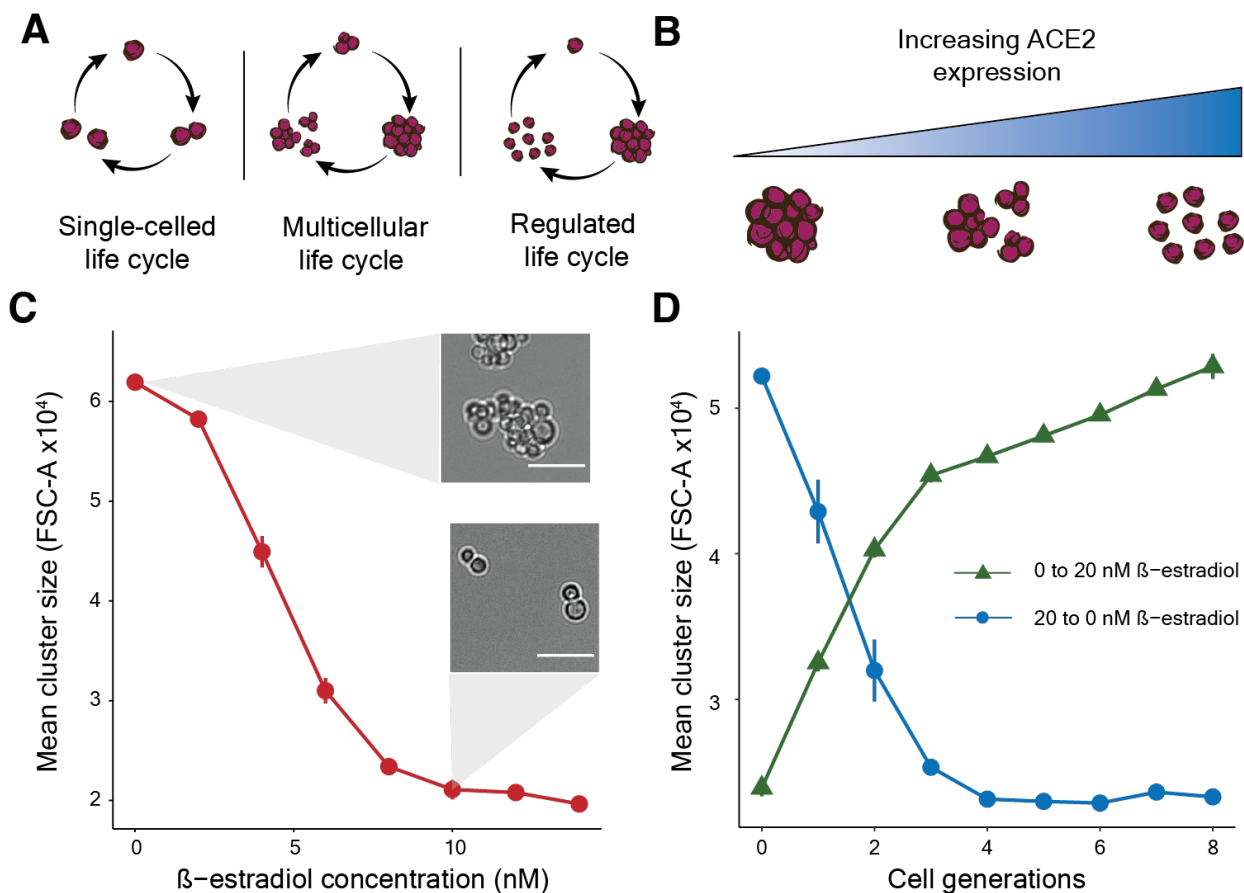

626

627 **Figure 3: Regulated life cycles can be engineered**

628 See also Figure S3.

629 A) Cartoon representation of the different engineered life cycles, Single-celled life cycle:  
 630 reproduction as single cells (most lab strains) . Multicellular life cycle: multicellular yeast clusters  
 631 that reproduce by breaking into smaller clusters. Regulated life cycle: a strain engineered to be  
 632 able to reproduce either as a single cell, or a multicellular cluster.

633 B) To create a regulated life cycle, we placed the ACE2 gene under a promoter regulated by  $\beta$ -  
 634 estradiol. In the absence of  $\beta$ -estradiol, ACE2 is not transcribed, and the strain reproduces as  
 635 clusters. Increasing the  $\beta$ -estradiol concentration produces a single-celled life cycle.

636 C) Mean forward scatter of the ACE2-inducible strain grown in yeast nitrogen base (YNB) with 10  
 637 mM glucose at increasing concentration of  $\beta$ -estradiol. Error bars represent the standard error of  
 638 the mean for 3 independent replicates. Scale bar represents 50  $\mu$ m.

639 D) Kinetics of cluster formation and dissolution on the removal or addition of  $\beta$ -estradiol. Error  
 640 bars represent the standard error of the mean for 3 independent replicates.

641

642

643

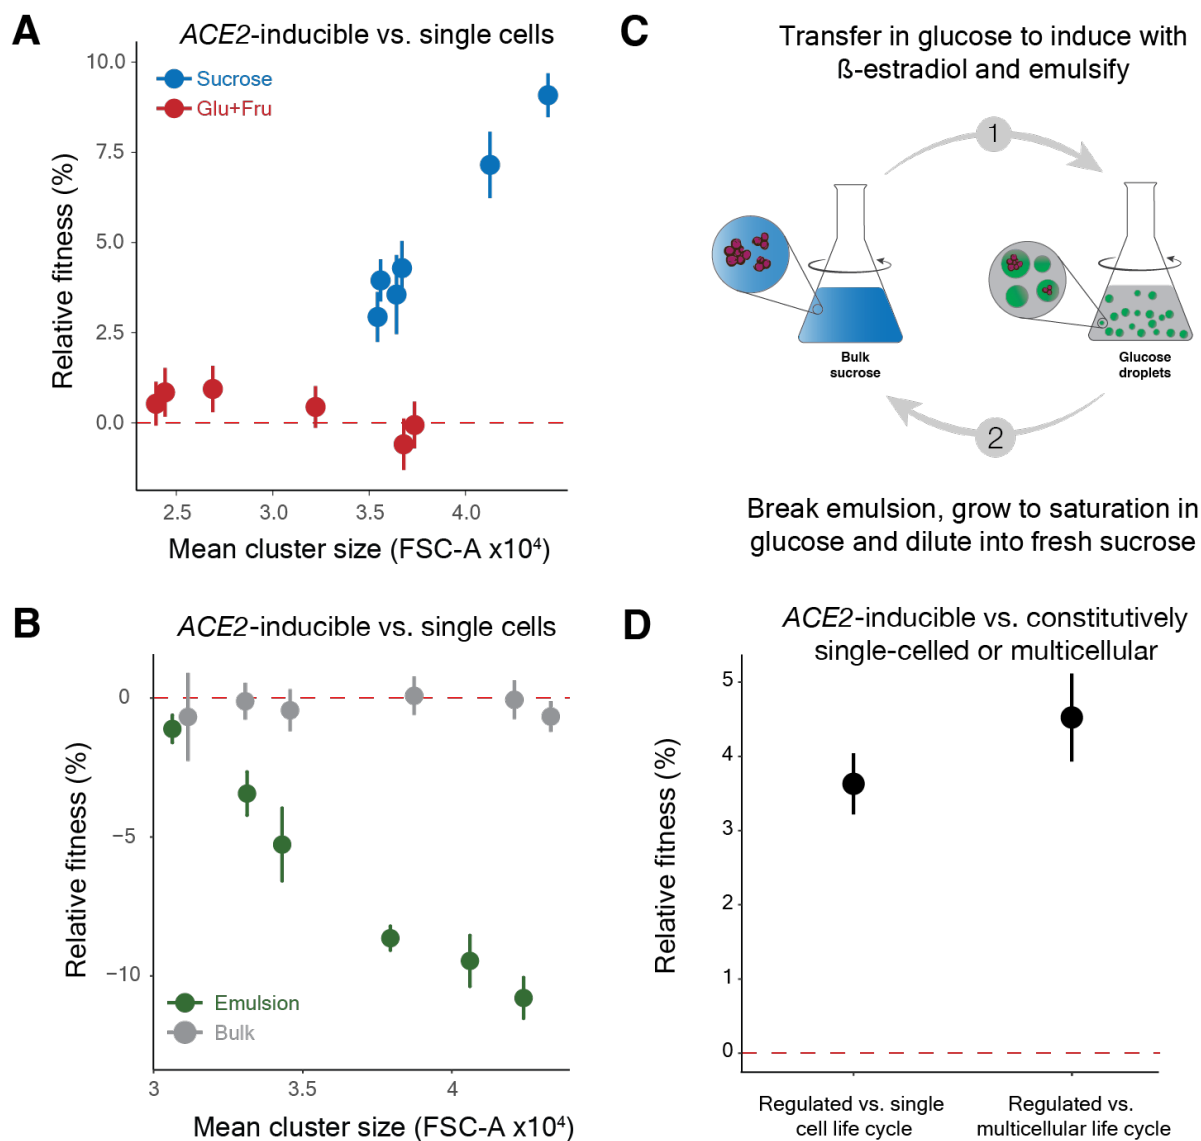

644  
645

646 **Figure 4: Resource availability controls the fitness differences between different life**  
647 **cycles.**

648 See also Figure S4.

649 A) Competition experiment between the ACE2-inducible strain and a constitutively single-celled  
650 reference strain in YNB with 10 mM sucrose (blue) or YNB with 10 mM glucose and 10 mM  
651 fructose (red) as a control. Each point shows the fitness of the inducible strain relative to the  
652 constitutively single-celled strain at a given ACE2 induction level. FSC-A stands for Forward  
653 SCatter Area and correlates with cluster size. Competitions performed for 3 cycles of growth and  
654 dilution. Error bars represent the standard error of the mean for 3 independent replicates.

655 B) Competition experiment between the ACE2-inducible strain and a constitutively single-celled  
656 reference strain in YNB with 100 mM glucose in emulsion (green) or in bulk as a control (grey).

657 *Each point shows the fitness of the inducible strain relative to the constitutively single-celled strain*  
658 *at a given ACE2 induction level. Error bars represent the standard error of the mean for 3*  
659 *independent replicates. Cells were seeded at density that corresponded to a mean of less than 1*  
660 *cell per drop of the emulsion. Competitions performed for 3 cycles of growth and dilution.*

661 *C) Protocol for the fluctuating selection regime. Cells are first grown for a cycle in YNB with 10*  
662 *mM sucrose before being transferred to YNB with 100 mM glucose and induced with  $\beta$ -estradiol*  
663 *for 24 hours. After induction, cells are put in an emulsion of YNB with 100 mM glucose for 48h.*  
664 *The emulsion is then broken, and cells are allowed to recover in 100 mM glucose YNB before the*  
665 *cycle starts again. Error bars represent the standard error of the mean for 3 independent*  
666 *replicates.*

667 *D) Competition experiment in the fluctuating selection regime between the ACE2-inducible strain*  
668 *and strains that are either constitutively single-celled or constitutively form clusters. Error bars*  
669 *represent the standard error of the mean for 3 independent replicates. Competitions were*  
670 *performed for 2 full selection cycles.*

671

672

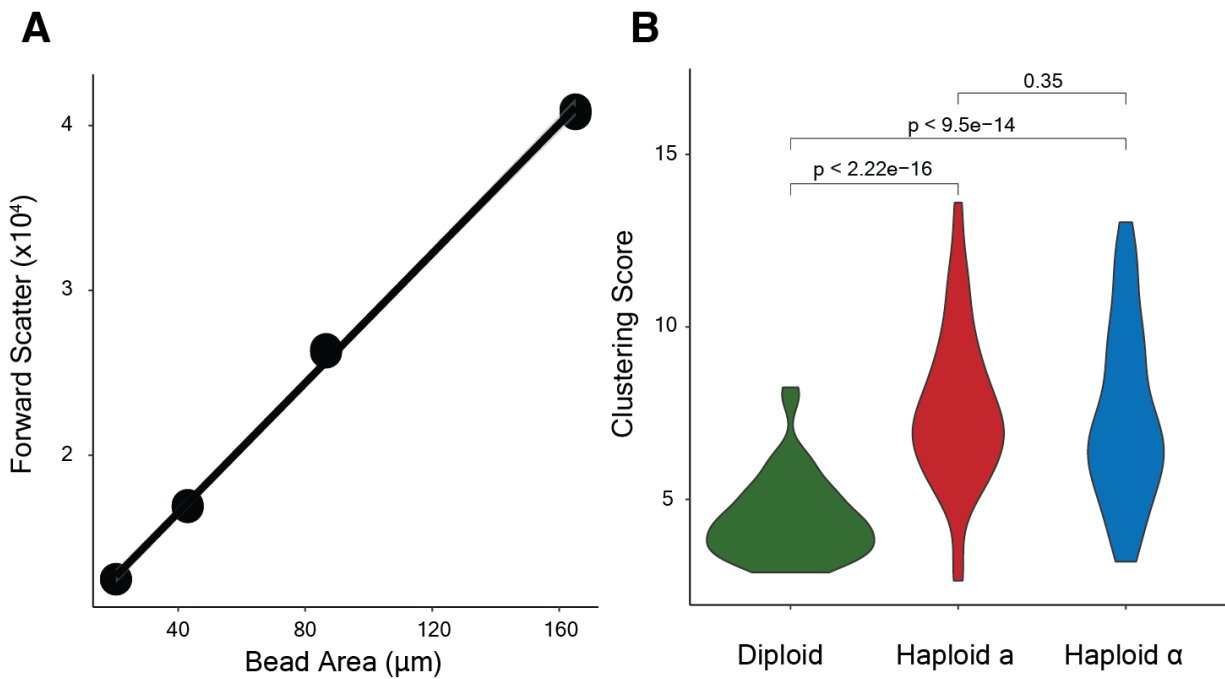

673

674 **Supplementary Figure 1:**

675 *A) correlation between bead cross-sectional area and mean forward scatter measurements.*

676 *FSC for each bead size was measured in 3 independent measurements.*

677 *B) Clustering score in YPD of all 23 strains. The indicated p-values are the results of Wilcoxon*

678 *test.*

679

680

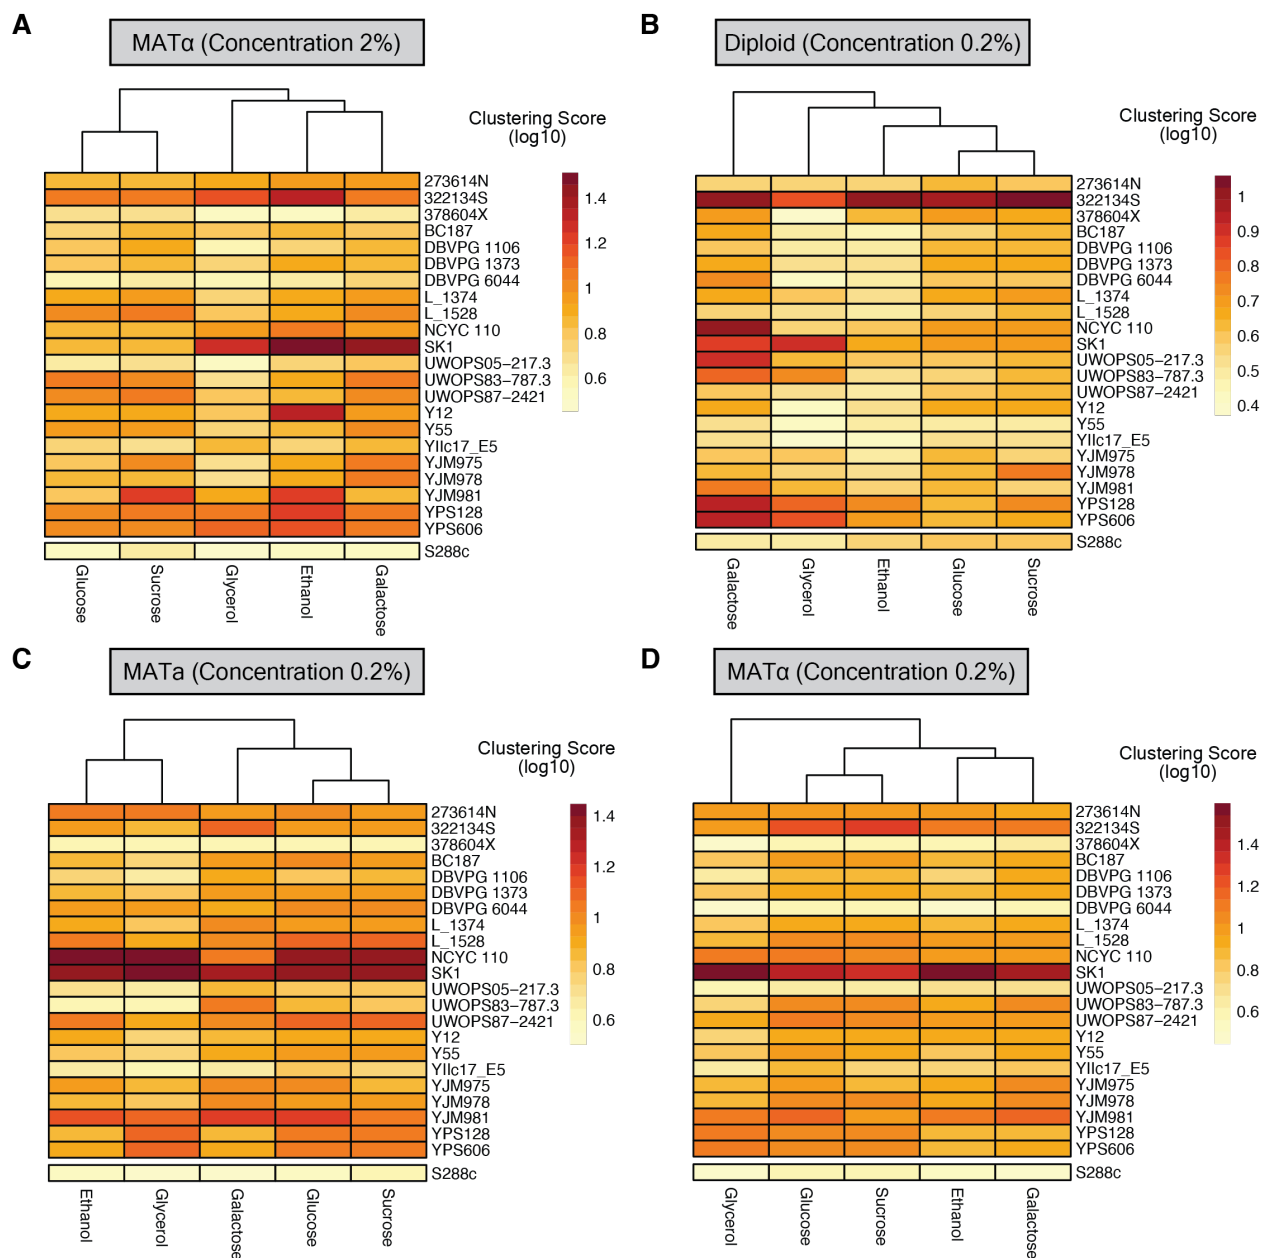

681

682

683

684 **Supplementary Figure 2:**

685 A) Clustering score for haploid MAT $\alpha$  isolates. Environments are hierarchically grouped. Strains  
686 were grown in YEP complemented with 5 different carbon source (concentration of 2% (w/v)).

687 B) Same as A but for diploid strains in sugar concentration of 0.2%.

688 C) Same as A but for MAT $\alpha$  strains in sugar concentration of 0.2%.

689 D) Same as A but for MAT $\alpha$  strains in sugar concentration of 0.2%.

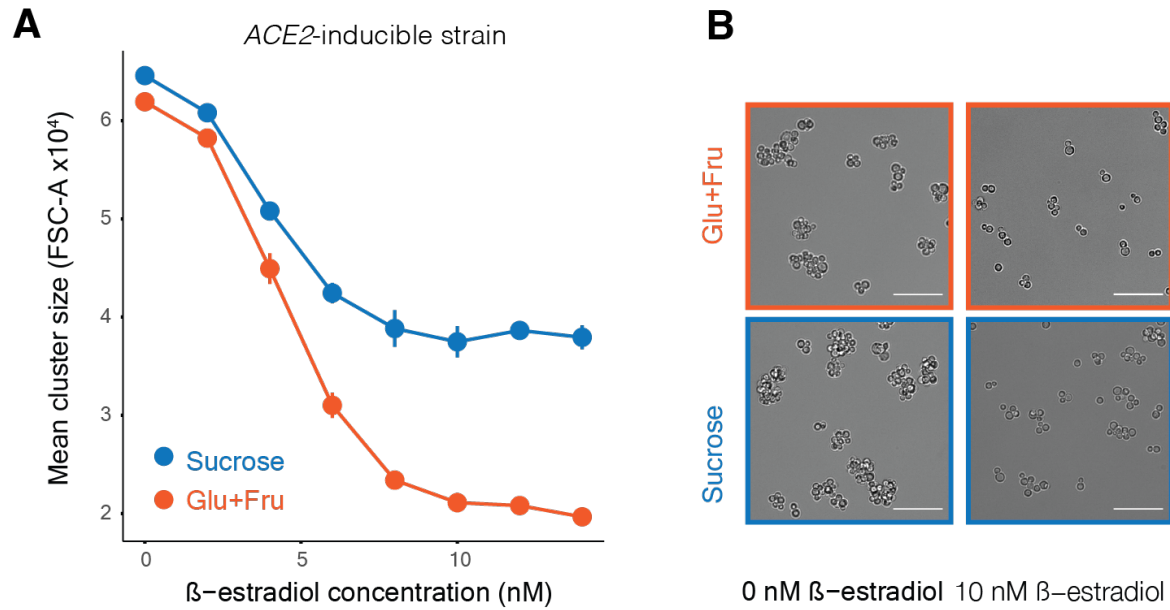

690  
691

692 **Supplementary Figure 3:**

693 *A) Mean forward scatter of the engineered, ACE2- inducible strain in glucose + fructose or*  
694 *sucrose at increasing concentration of β-estradiol. Error bars represent the standard error of the*  
695 *mean for 3 independent replicates.*

696 *B) DIC images of the ACE2-inducible strain when uninduced or induced with 10 nM of β-*  
697 *estradiol. Cells were grown in YNB with 10 mM sucrose or YNB with 10 mM glucose and 10 mM*  
698 *fructose. Scale bar represents 50 μm.*



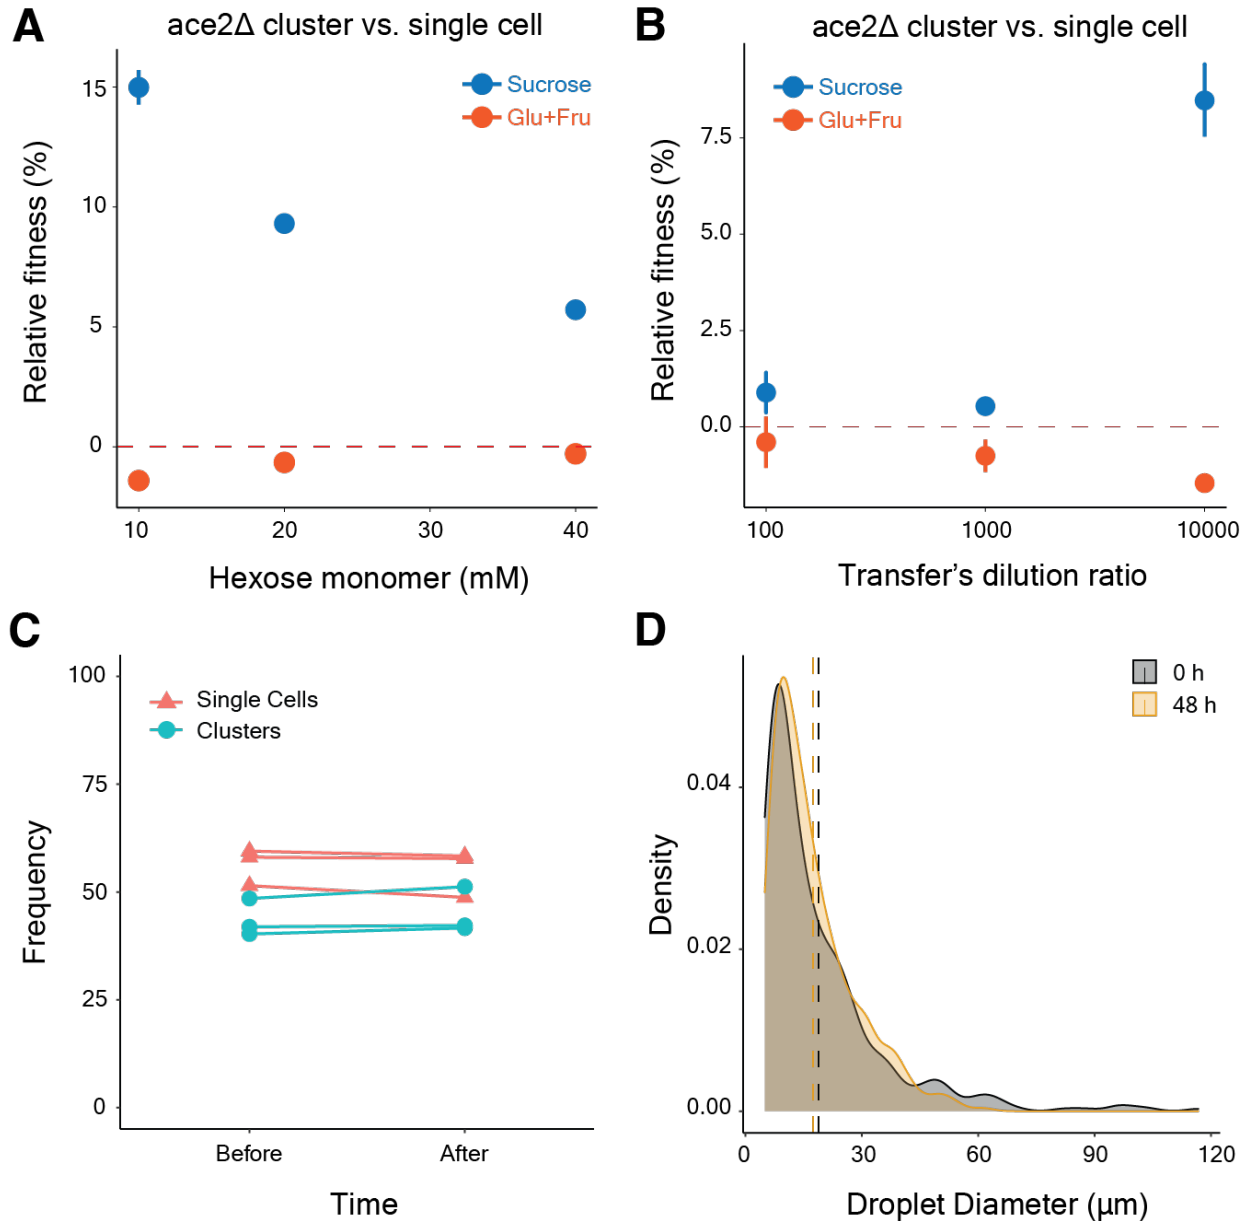

699  
700

701 **Supplementary Figure 4:**

702 A) Competition experiment between an *ace2Δ* cluster and a single cell in different concentrations  
703 of sucrose or glucose + fructose. These results confirm work by Koschwanez et al. (2013) and  
704 quantify the fitness advantage of clusters in sucrose. Error bars represent the standard error of  
705 the mean for 3 independent replicates.

706 B) Similar to A but competitions were done in 10 mM sucrose and 10 mM Glucose + 10 mM  
707 Fructose with different dilution factors between transfers (100 stands for a 1:100 dilution). A large  
708 dilution factor is needed to observe fitness differences between single cells and clusters. Error  
709 bars represent the standard error of the mean for 3 independent replicates.

710 *C) Measurements of ratio of single cells to clusters before introducing them into an emulsion and*  
711 *after immediately breaking the emulsion, with no intervening growth, to confirm that the emulsion*  
712 *protocol does not create a bias in favor of clusters or single cells.*

713 *D) Size distribution of emulsion droplets. The emulsion was imaged and droplet diameters were*  
714 *measured using Fiji.*

715
